# Supplementary material for: Multiplexed Proteomic Analysis for Diagnosis and Screening of Five Primary Immunodeficiency Disorders From Dried Blood Spots
Source: PubMed Central journal article supplement (PMC7141245; doi:10.3389/fimmu.2020.00464), 2020-04-01
Supplement: Table_1.pdf [file Table_1.pdf]

|            | 500x Stock<br>Concentration<br>(nM) | Optimized Final<br>Concentration<br>(nM) | mAb Bead<br>Mass<br>( $\mu$ g/sample) |
|------------|-------------------------------------|------------------------------------------|---------------------------------------|
| WAS 274    | 625                                 | 1.25                                     | 4                                     |
| BTK 407    | 625                                 | 1.25                                     | 1                                     |
| CYBB 509   | 5000                                | 10                                       | 0.1                                   |
| ADA 93     | 2500                                | 5                                        | 0.25                                  |
| DOCK8 1272 | 312.5                               | 0.625                                    | 2                                     |
| CD42 128   | 10000                               | 20                                       | 1                                     |
| CD42 154   | 5000                                | 10                                       | 0.5                                   |
| CD56 122   | 1250                                | 2.5                                      | 2                                     |
