# Supplementary material for: Multiplexed Proteomic Analysis for Diagnosis and Screening of Five Primary Immunodeficiency Disorders From Dried Blood Spots
Source: PubMed Central journal article supplement (PMC7141245; doi:10.3389/fimmu.2020.00464), 2020-04-01
Supplement: Table_2.pdf [file Table_2.pdf]

| Pt   | WASP 274<br>(pmol/L) | BTK 407<br>(pmol/L) | ADA 93<br>(pmol/L) | DOCK8 1272<br>(pmol/L) | CD42 128<br>(pmol/L) | CD42 154<br>(pmol/L) | CD56 122<br>(pmol/L) | Diagnosis  | Notes                               |
|------|----------------------|---------------------|--------------------|------------------------|----------------------|----------------------|----------------------|------------|-------------------------------------|
| 6    | 1668.6               | 21.0                | 2597.0             | 240.3                  | 11906.4              | 22763.1              | 1778.8               | XLA        |                                     |
| 7    | 1541.6               | 17.7                | 3573.6             | 256.3                  | 15071.2              | 17014.1              | 2383.3               | XLA        |                                     |
| 8    | 1736.6               | 5.3                 | 3244.4             | 344.2                  | 10077.6              | 13184.5              | 3006.1               | XLA        |                                     |
| 9    | 1977.8               | 3.0                 | 4093.2             | 406.5                  | 18928.4              | 22104.7              | 4781.6               | XLA        |                                     |
| 10   | 1667.8               | 21.6                | 2614.2             | 303.7                  | 15832.6              | 21988.7              | 2151.0               | XLA        |                                     |
| 18   | 168.1                | 352.0               | 7060.1             | 179.2                  | 3186.2               | 4207.0               | 1853.8               | WAS        |                                     |
| 19   | 41.9                 | 692.1               | 4669.1             | 430.3                  | 3633.9               | 4624.6               | 3470.8               | WAS        |                                     |
| 20-B | 1044.6               | 1157.7              | 6130.4             | 310.9                  | 10582.7              | 6115.7               | 6730.0               | Normal     | Post-BMT                            |
| 23   | 1273.2               | 956.4               | 3900.2             | 258.4                  | 13976.7              | 7180.6               | 4227.7               | Normal     | XL-CGD Pt:<br>CYBB 509 Not Measured |
| 25   | 790.5                | 583.1               | 2931.9             | 12.5                   | 6993.2               | 8774.2               | 2446.0               | DOCK8 Def. |                                     |
| 28   | 1204.5               | 919.6               | 105.8              | 230.3                  | 12432.1              | 14458.2              | 4070.6               | ADA Def.   | PEG-ADA ERT                         |
