# Supplementary material for: Multiplexed Proteomic Analysis for Diagnosis and Screening of Five Primary Immunodeficiency Disorders From Dried Blood Spots
Source: PubMed Central journal article supplement (PMC7141245; doi:10.3389/fimmu.2020.00464), 2020-04-01
Supplement: Table_3.pdf [file Table_3.pdf]

| Disease Or Cell Target                 | Marker Type | Protein | Peptide           | Sequence        | Mass (Da) | Parent Ion (m/z) | Fragment Ion (m/z)                                                                         |
|----------------------------------------|-------------|---------|-------------------|-----------------|-----------|------------------|--------------------------------------------------------------------------------------------|
| Wiskott-Aldrich Syndrome               | Primary     | WASP    | WASP 274 - 288    | AGISEAQLTDAETSK | 1521.76   | 760.88 ++        | [y10] - 1063.5266+, [y8] - 864.4309+, [y7] - 751.3468+, [y3] - 335.1925+, [b3] - 242.1499+ |
| X-Linked Agammaglobulinemia            | Primary     | BTK     | BTK 407 - 417     | ELGTGQFGVVK     | 1135.63   | 567.81 ++        | [y9] - 892.4887+, [y7] - 734.4196+, [y9] - 446.7480++                                      |
| X-Linked Chronic Granulomatous Disease | Primary     | CYBB    | CYBB 509 - 521    | TLYGRPNWDNEFK   | 1639.767  | 547.2670 +++     | [y12] - 769.8730++, [y11] - 713.3309++, [y10] - 631.7993++                                 |
| Adenosine Deaminase Deficiency         | Primary     | ADA     | ADA 93 - 101      | EGVVYVEVR       | 1049.173  | 525.2849 ++      | [y6] - 764.4301+, [y5] - 665.3617+, [y4] - 502.2984+                                       |
| DOCK8 Deficiency                       | Primary     | DOCK8   | DOCK8 1272 - 1283 | TSGIVLSSLPYK    | 1264.466  | 632.8610 ++      | [y10] - 1076.6350+, [y8] - 906.5295+, [y7] - 807.4611+                                     |
| Platelets                              | Secondary   | CD42    | CD42 128 - 137    | LTSLPLGALR      | 1040.254  | 520.8268 ++      | [y8] - 826.5145+, [y6] - 626.3984+, [y4] - 416.2616+                                       |
|                                        | Secondary   | CD42    | CD42 154 - 165    | TLPPGLLTPPK     | 1234.483  | 617.8739 ++      | [y10] - 1020.6088+, [y10] - 510.8080++, [y9] - 462.2817++                                  |
| NK Cells                               | Secondary   | CD56    | CD56 122 - 130    | NAPTPQEFR       | 1059.128  | 530.2645 ++      | [y7] - 874.4417+, [y6] - 777.3890+, [y5] - 676.3413+, [y4] - 579.2885+, [y7] - 437.7245++  |
